# Supplementary material for: Two Years of Active Pharmacovigilance Surveillance and Therapeutic Reconciliation in Frail Populations: The MEAP 3.0 Study
Source: MDPI journal article supplement (doi:10.3390/jcm12237447), 2023-11-30
Supplement: s1 [file s1]

Supplementary Figure S1. Counselling tool.

COUNSELLING TOOL

Patient's first and last name \_\_\_\_\_ Sex \_\_\_\_\_

Date of birth \_\_\_\_\_ Birthplace \_\_\_\_\_

Weight \_\_\_\_\_ Unit \_\_\_\_\_ Bed \_\_\_\_\_

Admission Date \_\_\_\_\_

THERAPY

| RECOGNITION |      |                         | RECONCILIATION     |                   |                         |             |          |
|-------------|------|-------------------------|--------------------|-------------------|-------------------------|-------------|----------|
| Therapy     | Dose | Route of administration | Therapy withdrawal | Change in therapy | No therapy interruption | New therapy | Comments |
|             |      |                         |                    |                   |                         |             |          |
|             |      |                         |                    |                   |                         |             |          |
|             |      |                         |                    |                   |                         |             |          |
|             |      |                         |                    |                   |                         |             |          |
|             |      |                         |                    |                   |                         |             |          |
|             |      |                         |                    |                   |                         |             |          |

Clinical question

Pharmacological analysis
